# Supplementary material for: Contrast-enhanced ultrasonography of the pancreas shows impaired perfusion in pancreas insufficient cystic fibrosis patients
Source: BMC Med Imaging. 2018 May 15;18:14. doi: 10.1186/s12880-018-0259-3 (PMC5952595; doi:10.1186/s12880-018-0259-3)
Supplement: Supplementary file 1 — Anonymized data file displaying the background data used in the article. (XLSX 16 kb) [file 12880_2018_259_MOESM1_ESM.xlsx]

## Sheet: data file
	Pasnu_an	Pasgroup	MTT	BV	Flow	gender	age range	BMI	Bik	EL	SweatCl	MTTobs2	BVobs2	BFobs2
CFS	1	0	3.93	5.67	86.7	0	20-29	21.6413	137	626	62	2.8	10.09	216				Pas group: 0=CFS, 1=CFI, 2=HC
	2	0	1.74	1.91	65.82	1	20-29	20.3712	124	567	60	4.34	3.48	48.13
	3	0	2.49	4.72	113.54	0	20-29	19.047	91	613	78	2.97	17	536.95
	4	0	7.36	10.83	88.33	0	50-59	21.9671	110	549		7.57	9.88	78.27
	5	0	4.15	5.35	77.36	1	70-79	22.0679	138	703	87	4.72	20.78	264.11
	6	0	4.85	2.17	26.83	0	20-29	20.7967	130	531	71	4.17	7.01	100.79
	7	0	5.93	3.96	40.07	1	15-19	26.3094	96	594	79	4.57	7.4	97.14
	8	0	2.72	4.47	98.42	0	20-29	22.231		209	72	1.77	7.62	258.75
	9	0	5.5	2.28	24.92	0	20-29	26.4024	118	476	67	3.96	6.83	103.69
	10	0	1.46	5.34	220.04	1	20-29	22.8624	62	575	78
	11	0	2.07	3.17	91.77	1	15-19	22.6627	115	506
	12	0	3.22	3.17	57.3	1	20-29	26.595	122	610	71
CFI	13	1	6.46	1.78	16.57	0	30-39	21.0077	21	5		4.92	3.72	45.32
	14	1	6.64	1.94	17.54	0	20-29	16.3593	11	0	89	1.83	2.61	85.61
	15	1	3.63	2.68	44.34	1	15-19	18.871		0		4.199	2.14	30.58
	16	1	11.86	3.66	16.5	1	20-29	22.7204		19	129	5.06	2.85	33.87
	17	1	3.8	0.93	14.74	0	50-59	23.7259	24	3		3.75	2.36	37.8
	18	1	4.8	1.47	18.41	0	20-29	23.0469	17	0	140	4.76	5.92	74.73
	19	1	5.85	3.26	33.48	1	15-19	18.8268	11	0	107	7.81	11.07	85.04
	20	1	9.6	0.95	5.95	0	20-29	21.4844	9	0	130	8.65	3	20.8
	21	1	12.49	4.66	22.4	1	40-49	23.291	11	0
	22	1	6.92	0.81	7	1	15-19	20.984	10	0	123
	23	1	11.13	2.05	11.03	1	20-29	19.6314	15	0	113
	24	1	10.63	2.92	16.5	0	15-19	20.5714		0	100	14.35	4.37	18.27
	25	1	11.51	3.98	20.74	1	30-39	26.841		0	100	13.28	9	40.64
HC	26	2	5.78	8.69	89.95	1	20-29	25.6489				5.25	10.9	124.5
	27	2	1.35	3.33	148.39	0	20-29	18.5568				1.48	3.31	134.74
	28	2	1.99	6.75	203.55	1	20-29	19.3502				1.56	5.47	209.92
	29	2	3.03	3.02	45.32	0	20-29	21.7193				1.24	4.35	209.34
	30	2	2.63	2.55	58.2	0	50-59	18.1775				3.72	4.58	73.65
	31	2	2.79	2.68	57.56	1	20-29	21.1327				4.08	6.12	90.05
	32	2	2.36	2.34	59.57	0	40-49	22.4813				2.43	3.46	85.05
	33	2	4.18	5.1	73.23	0	40-49	23.7812				2.21	14.47	391.76
	34	2	2.03	5.3	156.07	0	30-39	29.6875				2.82	6.35	135.16
	35	2	5.18	1.53	17.68	0	40-49	33.6823
	35	2	2.78	7.63	164.84	0	40-49	20.3125				3.57	12	201.35
	37	2	0.85	2.64	187.48	0	60-69	21.9671				2.79	5.4	115.83
	38	2	2.11	2.1	59.68	0	20-29	22.3478				2.21	2.93	79.8
	39	2	3.27	3.53	64.87	1	30-39	26.2507				3.58	8.67	145.11
	40	2	1.74	8.4	289.56	0	20-29	22.4323				2.21	9.37	254.8
	41	2	5.36	4.36	48.8	1	20-29	24.3827				3.25	5.19	95.71
	42	2	1.27	3.45	163.51	0	20-29	27.7744				1.18	7.13	362.12
	43	2	2.25	7.15	190.46	1	20-29	24.1517				2.17	9.98	275.61
	44	2	2.13	5	141.08	1	15-19	19.061				1.8	7.31	243.1
	45	2	4.5	9.7	129.16	0	15-19	15.777				1.11	3.43	169.42
